# Supplementary material for: Hyperpolarized [1-13C]-acetate Renal Metabolic Clearance Rate Mapping
Source: PubMed Central journal article supplement (PMC5700138; doi:10.1038/s41598-017-15929-x), 2017-11-22
Supplement: 41598_2017_15929_MOESM1_ESM.pdf [file 41598_2017_15929_MOESM1_ESM.pdf]

# Hyperpolarized [1-<sup>13</sup>C]-acetate Renal Metabolic Clearance Rate Mapping

Emmeli F. R. Mikkelsen<sup>1,2,§</sup>, Christian Østergaard Mariager<sup>1,§</sup>, Thomas Nørlinger<sup>1,2</sup>, Haiyun Qi<sup>1</sup>, Rolf F. Schulte<sup>3</sup>, Steen Jakobsen<sup>4</sup>, Jørgen Frøkiær<sup>4</sup>, Michael Pedersen<sup>2</sup>, Hans Stødkilde-Jørgensen<sup>1</sup>, and Christoffer Laustsen<sup>1</sup>

<sup>1</sup>*MR Research Centre, Aarhus University Hospital, Palle Juul-Jensens Boulevard 99, 8200 Aarhus N, Denmark.*

<sup>2</sup>*Comparative Medicine Lab, Aarhus University Hospital, Palle Juul-Jensens Boulevard 99, 8200 Aarhus N, Denmark.*

<sup>3</sup>*GE healthcare, Freisinger Landstraße 50, 85748 Munich, Germany.*

<sup>4</sup>*Department of Nuclear Medicine and PET Center, Aarhus University Hospital, Nørrebrogade, 8000 Aarhus C, Denmark*

§E.F.R.M and C.Ø.M contributed equally to this work

## **Corresponding author:**

Christoffer Laustsen  
Palle Juul Jensens boulevard 99  
8200 Aarhus N  
Denmark  
M +45 24439141  
Tel: +45 784 56139  
Fax: +45 784 56110  
Email: [cl@clin.au.dk](mailto:cl@clin.au.dk)

**Financial support:** The study was supported by Sundhed og Sygdom, Det Frie Forskningsråd and Aarhus University research fund.

**Short running title:** Hyperpolarized <sup>13</sup>C-acetate MRI

## SUPPLEMENTAL FIGURES.

### Supplemental figure 1.

In order to verify the existence of a metabolic component in the mean transit time, 4 female rats receiving a similar furosemide treatment was processed with the proposed method. A global  $T_1$  relaxation time of 24 sec, was used to correct the  $^{13}\text{C}$ -urea perfusion data.

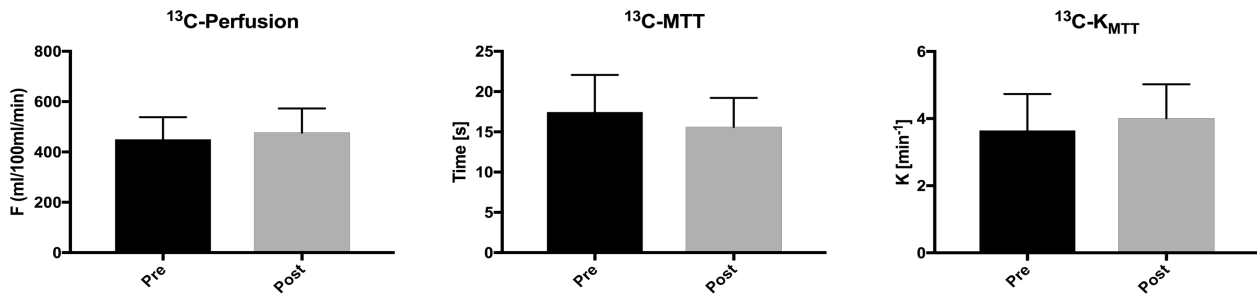

**SUPPLEMENTAL FIGURE 1.** The  $^{13}\text{C}$ -urea RBF did not differ statistically between pre ( $450 \pm 88$  ml/100 ml/min) and post administration of furosemide ( $477 \pm 96$  ( $\pm$ SD) ml/100 ml/min; paired  $t$ -test:  $P = 0.7$ ). Furthermore, no difference in the  $^{13}\text{C}$ -urea MTT of  $18 \pm 5$  ( $\pm$ SD) sec at baseline compared with  $16 \pm 4$  ( $\pm$ SD) sec post furosemide administration (paired  $t$ -test:  $P = 0.6$ ) was found.

### Supplemental figure 2.

Whole blood was extracted from two healthy rats into sodium heparin vacuum tubes. The blood was stored at  $5^\circ\text{C}$ . Prior to the experiment the blood was heated and maintained at  $37^\circ\text{C}$ . A volume of 4.5 ml blood was mixed with hyperpolarized  $^{13}\text{C}$ -acetate (0.5 ml) prior to placement in the scanner. The MR experiment was acquired over 120 s (120 acquisitions), with a constant flip angle of  $10^\circ$ . The single exponential decay was fitted in MATLAB and corrected for RF depletion.

$$\frac{1}{T_1} = \frac{1}{T_{1\text{eff}}} - \frac{\ln \cos \theta}{TR} \quad (\text{supplement eq. 1})$$

Where  $\theta$  is the RF flip angle and TR is the repetition time. Using the *ex vivo*  $T_{1\text{eff}}$  for correction, results in an underestimated absolute perfusion, lower MTT and thus larger  $K_{\text{MTT}}$ .

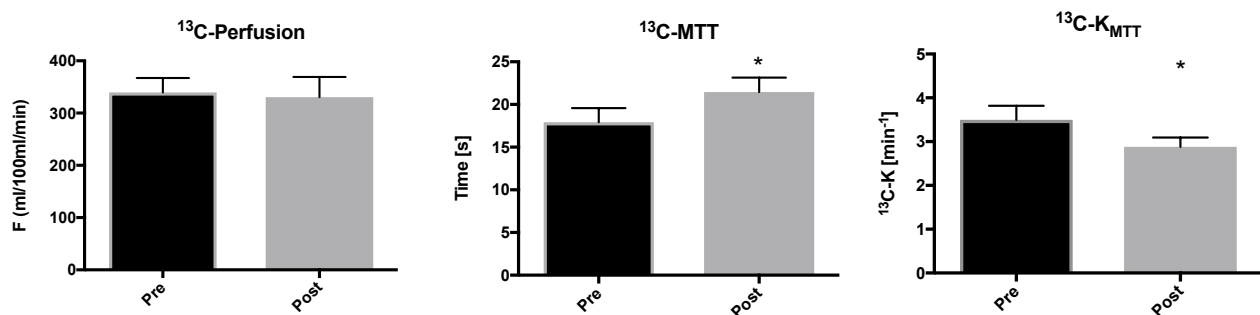

**SUPPLEMENTAL FIGURE 2.**  $^{13}\text{C}$ -acetate *in vivo* hemodynamic parameters (using whole blood  $T_1$  correction). Acetate perfusion (min/100 ml/mL), mean transit time (MTT) (sec), and acetate mean transit time metabolic clearance rate  $K_{MTT}$  ( $\text{min}^{-1}$ ) before and after administration of furosemide. The mean is plotted with standard errors.
